# Supplementary material
Source: publisher figshare collection journal article supplement (https://sage.figshare.com/ndownloader/files/17722505)
Supplement: Supplementary file 1 [file 17722505]

## Sheet: Sheet3
Table 1. Association data between inflammatory, remodeling and osteogenic markers, plasmatic and haemodynamic parameters. Top right pannel represents Pearson values (r) and lower left pannel represents p-values between every two measurements (p<0.05 significant values). Only significant values are shown.
Pearson (r) p-value	Osteocalcin	Osteopontin	TGFB1	ALPL	BMP2	BMP4	Pselectin	ICAM1	VCAM1	PECAM1	MMP2	MMP9	Fibronectin	Laminin	S100A4	aSMA	Glucose	HbA1c	AGE	FetuinA	Triglycerides	Cholesterol	LDL	HDL	VTI	Velocity	Cusp width	Valve opening
Osteocalcin		0.526668	3	0.88979	0.750761	0.77067	0.825805	0.528276	0.593326		0.620663	0.851876	0.617006			0.527458	0.754455					0.805596	0.802041		0.529641	0.584863
Osteopontin	0.00233621		0.545141	0.354463		0.423867		0.597549		0.470717	0.483872	0.521471	0.57101		0.474879		0.485905				0.567527			-0.441465	0.411125	0.476115
TGFB1		0.00151746								0.48576												-0.572767	-0.512686				-0.44535
ALPL	2.15929e-11	0.0504041			0.803797	0.816726	0.816317	0.507407	0.671505		0.539253	0.771139	0.537812			0.570721						0.85107	0.868618		0.55787	0.59096
BMP2	1.14534e-06			5.1693e-08		0.603534	0.659967		0.392975			0.502757	0.422533			0.432029	0.559268			0.431581		0.713043	0.767181
BMP4	3.94162e-07	0.0174886		2.10303e-08	0.000325134		0.762256	0.491868	0.542867		0.597459	0.813902	0.55412			0.56632						0.830727	0.853399		0.451229	0.476299	0.451634
Pselectin	1.07127e-08			2.16593e-08	5.36199e-05	6.2643e-07		0.655247	0.750414	-0.338813	0.607956	0.808936	0.488087		0.374936	0.711967	0.478237			0.574749		0.868774	0.895274		0.508195	0.475488
ICAM1	0.00225227	0.000385988		0.00357319		0.0049476	1.07753e-05		0.592549		0.626487	0.656393	0.495046		0.431643	0.421855	0.446454			0.570764	0.465214	0.586514	0.590827			0.468938
VCAM1	0.000434787			3.53962e-05	0.0287488	0.00160236	8.89442e-08	0.000111542			0.569458	0.65455	0.396652		0.336115	0.570993		-0.47023				0.662563	0.637235		0.595279	0.584536	0.517361
PECAM1		0.00752803	0.00560017				0.040238															-0.582493	-0.658938	-0.392919
MMP2	0.000195165	0.00581621		0.00174581		0.000386979	6.57491e-05	3.35334e-05	0.000234641			0.757747	0.636448		0.354182	0.444878					0.422062	0.524428	0.463141
MMP9	1.2187e-09	0.00262644		3.839e-07	0.00394492	2.57458e-08	1.37539e-09	1.02732e-05	1.10914e-05		5.62858e-08		0.680798		0.549385	0.636313	0.520558			0.517096	0.491767	0.895424	0.855047		0.554834	0.626105
Fibronectin	0.00021818	0.000794361		0.00180607	0.0178846	0.00121929	0.00217954	0.00183933	0.0150752		2.29293e-05	3.53797e-06			0.394833
Laminin
S100A4		0.00694547					0.0222255	0.0076407	0.0419583		0.0314978	0.000428887	0.0155882				0.519106			0.372295	0.651168	0.469784			0.422263
aSMA	0.00229463			0.000800349	0.0152221	0.000896784	7.76177e-07	0.00930566	0.000223705		0.00579961	2.30494e-05										0.657375	0.668838			0.427882
Glucose	0.000297067	0.0409113			0.0158186		0.0180872	0.0287472				0.00910981			0.00934006					0.53912	0.459173	0.428349	0.350322		0.222184	0.166494	0.121409
HbA1c									0.0115667												0.347527
AGE
FetuinA					0.0352202		0.000893871	0.000988831				0.00343297			0.0427662		0.000275915					0.488177	0.511167
Triglycerides		0.00382233						0.00958481			0.020166	0.00577912			9.74046e-05		0.00252915	0.0193297				0.521071		-0.42117				-0.476714
Cholesterol	2.03677e-06		0.00344191	1.36025e-07	9.20437e-05	5.03346e-07	4.84233e-10	0.000658422	6.63594e-05	0.00073189	0.00293048	2.39266e-11			0.00880981	7.91843e-05	0.00520561			0.00049941	0.000173146		0.915873		0.348102		0.410323
LDL	2.44216e-06		0.0104163	3.73144e-08	1.21979e-05	1.15684e-07	2.43894e-11	0.0005869	0.000152514	7.51054e-05	0.0099548	1.78424e-09				5.33467e-05	0.0247379			0.000240919		0		0.448558
HDL		0.0308023								0.031722											0.00319702		0.0015657
VTI	0.00647208	0.041184		0.00375929		0.0235722	0.00949405		0.00169432			0.00399456			0.0354906							0.0347479				0.956983
Velocity	0.00213556	0.0161338		0.00186675		0.016087	0.0162939	0.0180476	0.0021509			0.000814069				0.0328666									0
Cusp width			0.0490902			0.0456102			0.0194818													0.0143555
Valve opening																					0.0119359
TGFB1 - tumor growth factor β1; ALPL - alkaline phosphatase; BMP2 - bone morphogenic protein 2; BMP4 - bone morphogenic protein 4; ICAM-1 – intercellular adhesion molecule-1; VCAM-1 – vascular cellular adhesion molecule-1; PECAM-1 – platelet endothelial cellular adhesion molecule-1; MMP2 – matrix metalloproteinase 2; MMP9 – matrix metalloproteinase 9; αSMA – alpha smooth muscle actin; HbA1c - hae…
